# Supplementary material
Source: MDPI journal article supplement (https://www.mdpi.com/2227-9717/10/11/2270)
Supplement: s1 [file s1]

Archive with 2 entries (2 files):
- Annex.pdf
- Fig Suppl. GC-MS chromatograms (5 min and 3 h).pdf
