# Supplementary material
Source: MDPI journal article supplement (https://www.mdpi.com/2227-9717/10/11/2270)
Supplement: s1 [file s1]

**Table S1.** Composition of the cuticular waxes of cork oak leaves solubilised in n-hexane with different extraction times as determined by GC-MS, in % of total peak area.

| Wax constituent (% total peak area)                                 | Extraction time |      |      |      |      |
|---------------------------------------------------------------------|-----------------|------|------|------|------|
|                                                                     | 5 min           | 1 h  | 2 h  | 3 h  | 6 h  |
| <b>n-Alkanes</b>                                                    |                 |      |      |      |      |
| Tetradecane (C <sub>14</sub> )                                      | -               | 0.06 | -    | -    | -    |
| Hexadecane (C <sub>16</sub> )                                       | -               | 0.11 | -    | -    | -    |
| 2,6,10-Trimethyl tetradecane (C <sub>17</sub> )                     | -               | 0.08 | 0.03 | 0.06 | -    |
| 6-Methyl octadecane (C <sub>19</sub> )                              | -               | 0.11 | -    | -    | -    |
| Nonadecane (C <sub>19</sub> )                                       | -               | 0.05 | 0.01 | -    | 0.1  |
| Docosane (C <sub>22</sub> )                                         | -               | 0.03 | 0.01 | -    | -    |
| Tricosane (C <sub>23</sub> )                                        | -               | 0.03 | -    | -    | -    |
| Tetracosane (C <sub>24</sub> )                                      | -               | 0.02 | -    | -    | -    |
| Pentacosane (C <sub>25</sub> )                                      | -               | 0.04 | 0.03 | 0.05 | 0.05 |
| Hexacosane (C <sub>26</sub> )                                       | -               | 0.03 | 0.02 | -    | -    |
| Heptacosane (C <sub>27</sub> )                                      | -               | 0.49 | 0.39 | 1.12 | 1.02 |
| 1-Nonacosene (C <sub>29</sub> )                                     | -               | 0.13 | 0.1  | 0.04 | 0.1  |
| Nonacosane (C <sub>29</sub> )                                       | 0.17            | 0.21 | 0.02 | 0.13 | 0.14 |
| Triacotane (C <sub>30</sub> )                                       | -               | 5.1  | 2.47 | 4.89 | 4.66 |
| Hentriacotane (C <sub>31</sub> )                                    | 0.07            | 0.42 | 0.37 | 0.65 | 0.56 |
| <b>n-Alkanols</b>                                                   |                 |      |      |      |      |
| Butane-2,3-diol C <sub>4</sub> H <sub>10</sub> O <sub>2</sub>       | -               | 0.23 | -    | -    | 0.58 |
| Butane-1,2,3-triol (C <sub>4</sub> H <sub>10</sub> O <sub>3</sub> ) | -               | 0.12 | -    | -    | 0.09 |
| 2-Undecen-1-ol (E)-(C <sub>11</sub> H <sub>22</sub> O)              | -               | 0.24 | 0.02 | 0.04 | 0.03 |
| Hexadecan-1-ol (C <sub>16</sub> OH)                                 | -               | 1.15 | 0.15 | 0.24 | 0.23 |
| Heptadecan-1-ol (C <sub>17</sub> OH)                                | -               | 0.64 | -    | -    | 0.74 |
| Octadecan-1-ol (C <sub>18</sub> OH)                                 | -               | 0.12 | 0.01 | 0.05 | 0.04 |
| Eicosan-1-ol (C <sub>20</sub> OH)                                   | -               | 0.09 | -    | -    | 0.02 |
| Docosan-1-ol (C <sub>22</sub> OH)                                   | 1.24            | -    | 0.61 | -    | 0.7  |
| Tricosan-1-ol (C <sub>23</sub> OH)                                  | 0.02            | 0.01 | 0.02 | 0.03 | 0.03 |
| Tetracosan-1-ol (C <sub>24</sub> OH)                                | 96.67           | 2.91 | 3.11 | 3.05 | 4.34 |
| Pentacosan-1-ol (C <sub>25</sub> OH)                                | 0.02            | -    | -    | 0.02 | 0.02 |
| Hexacosan-1-ol (C <sub>26</sub> OH)                                 | 0.45            | 0.03 | 0.04 | 0.05 | 0.08 |
| Octacosan-1-ol (C <sub>28</sub> OH))                                | -               | -    | 0.08 | 0.26 | 0.11 |
| <b>Fatty acids</b>                                                  |                 |      |      |      |      |
| <b>Saturated</b>                                                    |                 |      |      |      |      |
| Heptanoic acid (C <sub>7:0</sub> )                                  | -               | 0.64 | 0.26 | 0.09 | -    |
| Octanoic acid (C <sub>8:0</sub> )                                   | -               | 0.44 | 0.03 | 0.38 | 0.05 |
| Nonanoic (C <sub>9:0</sub> )                                        | -               | 0.85 | 0.05 | 0.06 | 0.07 |
| Tetradecanoic acid (C <sub>14:0</sub> )                             | -               | 0.09 | 0.04 | 0.03 | 0.05 |
| Pentadecanoic acid (C <sub>15:0</sub> )                             | -               | 0.03 | 0.03 | 0.05 | 0.04 |
| Hexadecanoic acid (C <sub>16:0</sub> )                              | -               | 7.57 | 5.35 | 5.57 | 5.32 |
| Heptadecanoic acid (C <sub>17:0</sub> )                             | -               | 0.02 | 0.03 | 0.04 | 0.04 |
| Octadecanoic acid (C <sub>18:0</sub> )                              | -               | 0.43 | 0.38 | 0.43 | 0.4  |
| Eicosanoic acid (C <sub>20:0</sub> )                                | -               | 0.2  | 0.23 | 0.04 | 0.3  |
| Docosanoic acid (C <sub>22:0</sub> )                                | -               | 0.11 | 0.12 | 0.24 | 0.22 |
| Tetracosanoic acid (C <sub>24:0</sub> )                             | 0.17            | 0.11 | -    | 0.38 | 0.37 |
| Hexacosanoic acid (C <sub>26:0</sub> )                              | 0.01            | 0.14 | 0.22 | 0.9  | 1.05 |
| Octacosanoic acid (C <sub>28:0</sub> )                              | -               | 0.57 | 0.76 | 2.61 | 3.39 |
| Triacotanoic acid (C <sub>30:0</sub> )                              | -               | 0.29 | 0.32 | 1.08 | 1.37 |
| <b>Unsaturated</b>                                                  |                 |      |      |      |      |
| 9-cis-Hexadecenoic acid (C <sub>16:1</sub> )                        | -               | 0.05 | 0.08 | 0.11 | 0.11 |
| 9-Octadecenoic acid (C <sub>18:1</sub> )                            | -               | 0.03 | -    | -    | -    |
| 9,12-Octadecadienoic acid (C <sub>18:2</sub> )                      | -               | -    | 0.84 | 1.12 | 0.81 |
| 9,12,15-Octadecatrienoic acid (C <sub>18:3</sub> )                  | -               | -    | 2.28 | 3.43 | 2.11 |
| Docosahexaenoic acid (C <sub>22:6</sub> )                           | -               | -    | -    | 0.04 | -    |
| <b>Diacids</b>                                                      |                 |      |      |      |      |
| Butanedioic acid (C <sub>4:0</sub> )                                | -               | -    | -    | -    | 0.17 |
| Nonanedioic acid (C <sub>9:0</sub> )                                | -               | 0.06 | 0.01 | 0.01 | -    |
| 2-Butenedioic acid (C <sub>4:1</sub> )                              | -               | 0.21 | -    | -    | 0.22 |
| <b>Hydroxyacids</b>                                                 |                 |      |      |      |      |
| 2-Hydroxyoctanoic acid (C <sub>8:0</sub> )                          | -               | -    | 0    | 0.02 | -    |
| <b>Glycerides</b>                                                   |                 |      |      |      |      |

|                                                           |      |       |       |       |       |
|-----------------------------------------------------------|------|-------|-------|-------|-------|
| 3-Hydroxypropyl hexadecanoate                             | -    | 0.02  | -     | 0.04  | 0.11  |
| Glycerol                                                  | -    | -     | -     | 0.07  | -     |
| 1-Linolenoylglycerol                                      | -    | -     | 0.03  | 0.09  | -     |
| 2-Monostearin                                             | -    | -     | 0.02  | 0.17  | 0.07  |
| Monopalmitin                                              | -    | 0.1   | 0.11  | 0.15  | 0.08  |
| Monolinolenin                                             | -    | -     | 0.04  | 0.09  | 0.03  |
| <b>Sterols</b>                                            |      |       |       |       |       |
| δ-Tocopherol                                              | -    | -     | 0.23  | 0.35  | 0.18  |
| Stigmasterol                                              | -    | -     | 0.05  | 0.06  | -     |
| β-Sistoterol                                              | -    | -     | 2.82  | 3.5   | 2.5   |
| 25-Hydroxycholesterol                                     | -    | -     | 0.07  | 0.16  | -     |
| Cholest-5-en-3-ol, (3α)                                   | -    | 0.01  | 0.05  | 0.08  | -     |
| <b>Terpenes</b>                                           |      |       |       |       |       |
| <b>Diterpenes</b>                                         |      |       |       |       |       |
| Phytol                                                    | -    | -     | 0.12  | 0.21  | 0.16  |
| Ginkgolide-B                                              | -    | 0.22  | -     | -     | -     |
| <b>Pentacyclic triterpenes</b>                            |      |       |       |       |       |
| α-Amyrin                                                  | 0.01 | 0.68  | 0.79  | 0.77  | 0.74  |
| β-Amyrin                                                  | 0.02 | 3.02  | 2.83  | 3.11  | 2.47  |
| Erythrodiol (α-Amyrin)                                    | -    | -     | 0.11  | 0.12  | 0.13  |
| Germanicol                                                | 0.01 | 11.19 | 17.31 | 7.49  | 6     |
| Lupeol                                                    | 0.07 | 43.93 | 40.43 | 37.76 | 33.04 |
| Betulin                                                   | -    | 0.46  | 0.9   | 1.12  | 0.97  |
| Betulinic acid                                            | -    | 0.05  | 0.56  | 0.74  | 0.56  |
| Oleanolic acid                                            | -    | 0.08  | 0.29  | 0.46  | 0.41  |
| Ursolic acid                                              | -    | 0.06  | 0.09  | 0.14  | 0.13  |
| Corosolic acid                                            | -    | -     | -     | 0.04  | -     |
| <b>Aromatic compounds</b>                                 |      |       |       |       |       |
| Benzoic acid                                              | 0.01 | 0.22  | 0.12  | 0.13  | 0.45  |
| 4-Hydroxybenzaldehyde                                     | -    | 0.11  | -     | -     | -     |
| 4-Hydroxybenzoic acid                                     | -    | -     | -     | 0.05  | -     |
| Vanillin acid                                             | -    | -     | -     | 0.01  | -     |
| 1,2-Benzenedicarboxylic acid                              | -    | 0.16  | 0.05  | 0.12  | -     |
| 1,2-Benzenedicarboxylic acid, butyl 8-methylnonyl ester   | -    | 0.05  | 0.15  | -     | 0-    |
| Hexadecy-(E)-p-coumarate                                  | -    | 0.56  | 1.74  | 2.32  | 1.63  |
| Hexadecy-(E)-p-coumarate (Isomer)                         | -    | 0.56  | 2.47  | 3     | 2.03  |
| Phenethyl icosanoate                                      | -    | 1.66  | 4.54  | 5.63  | 4.11  |
| <b>Others compounds</b>                                   |      |       |       |       |       |
| 4,8,12,16-Tetramethylheptadecan-4-olide                   | -    | 0.17  | 0.09  | 0.13  | -     |
| (15R)-15-methyl prostaglandin E2 methyl ester             | -    | -     | 0.07  | 0.09  | -     |
| Ethylene glycol                                           | -    | 0.58  | 0.59  | 0.07  | -     |
| Acetic acid                                               | -    | 0.22  | -     | -     | -     |
| 7,9-Di-tert-butyl-1-oxaspiro[4.5]deca-6,9-diene-2,8-dione | -    | 0.21  | 0.06  | -     | 0.06  |
| 2-Pentadecanone, 6,10,14-trimethyl                        | -    | 0.34  | 0.06  | 0.08  | 0.09  |
| Phenethyl icosanoate                                      | -    | 0.08  | 0.06  | 0.14  | 0.1   |
| <b>Total identified</b>                                   | 98.0 | 87.37 | 90.72 | 89.96 | 81.52 |

**Table S2.** Composition of the cuticular waxes of cork oak leaves solubilised in dichloromethane with different extraction times as determined by GC-MS, in % of total peak area.

| Wax constituent (% total peak area)                                | Extraction time |      |      |      |      |
|--------------------------------------------------------------------|-----------------|------|------|------|------|
|                                                                    | 5 min           | 1 h  | 2 h  | 3 h  | 6 h  |
| <b>n-Alkanes</b>                                                   |                 |      |      |      |      |
| Nonadecane (C <sub>19</sub> )                                      | 0.02            | -    | -    | -    | 0.06 |
| Heptacosane (C <sub>27</sub> )                                     | -               | 0.41 | 0.44 | 0.29 | 0.57 |
| Octacosane (C <sub>28</sub> )                                      | 0.01            | 0.09 | 0.07 | 0.08 | 0.04 |
| 1-Nonacosene (C <sub>29</sub> )                                    | -               | 0.07 | 0.09 | 0.07 | 0.09 |
| Nonacosane (C <sub>29</sub> )                                      | 0.28            | 2.53 | 2.18 | 1.47 | 2.56 |
| Triacontane (C <sub>30</sub> )                                     | -               | 0.34 | 0.3  | 0.25 | 0.33 |
| Hentriacontane (C <sub>31</sub> )                                  | 0.11            | -    | -    | -    | -    |
| <b>n-Alkanols</b>                                                  |                 |      |      |      |      |
| Butane-1,2,3-triol C <sub>4</sub> H <sub>10</sub> O <sub>3</sub> ) | -               | 0.39 | 0.58 | 0.47 | 0.20 |
| Hexadecan-1-ol (C <sub>16</sub> OH)                                | -               | 0.25 | 0.22 | 0.24 | 0.21 |
| Octadecan-1-ol (C <sub>18</sub> OH)                                | -               | 0.04 | 0.05 | 0.05 | 0.04 |
| Eicosan-1-ol (C <sub>20</sub> OH)                                  | 0.01            | -    | -    | -    | 0.01 |
| 2-Octyldodecanol C <sub>20</sub> H <sub>42</sub> O                 | -               | -    | 0.36 | 0.02 | 0.01 |
| Docosan-1-ol (C <sub>22</sub> OH)                                  | 2.37            | 0.77 | 1.12 | 1.10 | 1.85 |
| Tricosan-1-ol (C <sub>23</sub> OH)                                 | 0.03            | 0.02 | 0.03 | 0.03 | 0.07 |
| Tetracosan-1-ol (C <sub>24</sub> OH)                               | 92.12           | 3.47 | 4.59 | 3.31 | 4.62 |
| Pentacosan-1-ol (C <sub>25</sub> OH)                               | 0.02            | -    | -    | -    | 0.03 |
| Hexacosan-1-ol (C <sub>26</sub> OH)                                | 0.90            | 0.04 | 0.05 | 0.04 | 0.16 |
| Octacosan-1-ol (C <sub>28</sub> OH))                               | -               | 0.11 | 0.31 | 0.26 | 0.06 |
| <b>Fatty acids</b>                                                 |                 |      |      |      |      |
| <b>Saturated</b>                                                   |                 |      |      |      |      |
| Hexenoic acid (C <sub>6:0</sub> )                                  | -               | 0.08 | 0.11 | 0.14 | 0.13 |
| Octanoic acid (C <sub>8:0</sub> )                                  | -               | 0.17 | 0.03 | 0.05 | 0.06 |
| Nonanoic (C <sub>9:0</sub> )                                       | -               | 0.08 | 0.06 | -    | -    |
| Decanoic acid (C <sub>10:0</sub> )                                 | 0.01            | -    | -    | -    | -    |
| Tetradecanoic acid (C <sub>14:0</sub> )                            | -               | 0.03 | 0.06 | 0.09 | 0.05 |
| Hexadecanoic acid (C <sub>16:0</sub> )                             | 0.07            | 7.6  | 9.84 | 9.71 | 9.68 |
| Heptadecanoic acid (C <sub>17:0</sub> )                            | -               | 0.03 | 0.06 | 0.08 | 0.03 |
| Octadecanoic acid (C <sub>18:0</sub> )                             | 0.02            | 0.32 | 0.59 | 0.73 | 0.42 |
| Eicosanoic acid (C <sub>20:0</sub> )                               | 0.01            | 0.24 | 0.42 | 0.46 | 0.28 |
| Docosanoic acid (C <sub>22:0</sub> )                               | 0.05            | 0.19 | 0.32 | 0.28 | 0.24 |
| Tetracosanoic acid (C <sub>24:0</sub> )                            | 0.47            | -    | 0.41 | 0.28 | 0.41 |
| Hexacosanoic acid (C <sub>26:0</sub> )                             | 0.04            | 0.55 | 0.94 | 0.44 | 0.95 |
| Octacosanoic acid (C <sub>28:0</sub> )                             | 0.04            | 1.6  | 2.31 | 1.14 | 2.49 |
| Triacontanoic acid (C <sub>30:0</sub> )                            | 0.02            | 0.58 | 0.67 | 0.39 | 0.74 |
| <b>Unsaturated</b>                                                 |                 |      |      |      |      |
| 9-cis-Hexadecenoic acid (C <sub>16:1</sub> )                       | -               | 0.18 | 0.25 | 0.29 | 0.15 |
| 9,12-Octadecadienoic acid (C <sub>18:2</sub> )                     | -               | 0.14 | 1.73 | 2.38 | 0.75 |
| 9,12,15-Octadecatrienoic acid (C <sub>18:3</sub> )                 | -               | 0.39 | 6.43 | 8.04 | 2.69 |
| Docosahexaenoic acid (C <sub>22:6</sub> )                          | -               | 0.03 | 0.23 | 0.34 | 0.13 |
| <b>Diacids</b>                                                     |                 |      |      |      |      |
| Butanedioic acid (C <sub>4:0</sub> )                               | -               | 0.32 | 0.3  | 0.07 | 0.61 |
| Nonanedioic acid (C <sub>9:0</sub> )                               | -               | 0.06 | 0.07 | 0.1  | 0.05 |
| Dodec-2-enedioic acid (C <sub>12:1</sub> )                         | -               | 0.02 | 0.08 | 0.1  | 0.05 |
| <b>Hydroxyacids</b>                                                |                 |      |      |      |      |
| 2-Hydroxyoctanoic acid (C <sub>8:0</sub> )                         | -               | 0.03 | 0.08 | 0.14 | 0.04 |
| <b>Glycerides</b>                                                  |                 |      |      |      |      |
| Glycerol                                                           | -               | 0.95 | 2.14 | 0.51 | -    |
| 2-Monostearin                                                      | -               | 0.02 | 0.04 | 0.03 | 0.03 |
| Monopalmitin                                                       | -               | 0.15 | 0.24 | 0.22 | 0.23 |
| Monolinolenin                                                      | -               | 0.02 | 0.17 | 0.2  | 0.1  |
| 1-Linolenoylglycerol                                               | -               | 0.02 | 0.32 | 0.38 | 0.19 |
| <b>Sterols</b>                                                     |                 |      |      |      |      |
| δ-Tocopherol                                                       | 0.07            | 0.19 | 0.19 | 0.05 | 0.07 |
| Stigmasterol                                                       | 0.06            | 0.09 | 0.11 | 0.11 | 0.06 |
| β-Sistotol                                                         | 1.59            | 2.55 | 2.33 | 3.24 | 1.59 |
| 25-Hydroxycholesterol                                              | 0.24            | 0.12 | 0.1  | 0.04 | 0.24 |
| <b>Terpenes</b>                                                    |                 |      |      |      |      |

|                                                           |              |              |              |              |              |
|-----------------------------------------------------------|--------------|--------------|--------------|--------------|--------------|
| <b>Diterpenes</b>                                         |              |              |              |              |              |
| Phytol                                                    | -            | 0.02         | 0.4          | 0.25         | 0.14         |
| <b>Pentacyclic triterpenes</b>                            |              |              |              |              |              |
| $\alpha$ -Amyrin                                          | 0.06         | 0.8          | 0.66         | 0.84         | 0.58         |
| $\beta$ -Amyrin                                           | 0.13         | 2.75         | 2.29         | 2.56         | 2.11         |
| Erythrodiol (a-Amyrin)                                    |              | 0.09         | 0.14         | 0.2          | 0.07         |
| Germanicol                                                | 0.14         | 9.15         | 5.46         | 6.46         | 4.77         |
| Lupeol                                                    | 1.61         | 45.44        | 31.56        | 35.28        | 35.37        |
| Betulin                                                   | -            | 0.52         | 0.64         | 0.91         | 0.55         |
| Betulinic acid                                            | -            | 0.28         | 0.46         | 0.61         | 0.35         |
| Oleanolic acid                                            | -            | 0.44         | 0.57         | 0.62         | 0.45         |
| Ursolic acid                                              | 0.01         | 0.3          | 0.33         | 0.39         | 0.21         |
| Corosolic acid                                            | -            | 0.1          | 0.18         | 0.23         | 0.16         |
| <b>Aromatic compounds</b>                                 |              |              |              |              |              |
| Benzoic acid                                              | -            | 0.27         | 0.21         | 0.37         | 0.32         |
| 4-Hydroxybenzaldehyde                                     | -            | 0.09         | -            | -            | -            |
| Vanillin acid                                             | -            | 0.11         | 0.1          | 0.11         | 0.1          |
| Hexadecy-(E)-p-coumarate                                  | 0.59         | 4.27         | 5.31         | 5.19         | 4.09         |
| <b>Sugars</b>                                             |              |              |              |              |              |
| Levoglucozan                                              | -            | -            | -            | -            | 0.42         |
| Fructofuranose                                            | -            | 0.09         | 0.54         | 1.43         | 0.18         |
| <b>Others compounds</b>                                   |              |              |              |              |              |
| 4,8,12,16-Tetramethylheptadecan-4-olide                   | -            | 0.11         | 0.12         | 0.04         | 0.14         |
| (15R)-15-methyl prostaglandin E2 methyl ester             | -            | 0.08         | 0.27         | 0.4          | 0.15         |
| Lactic acid                                               | 0.16         | -            | -            | -            | -            |
| 3-Hydroxypropyl hexadecanoate                             | -            | 0.02         | 0.04         | 0.01         | 0.05         |
| 2-(2-Butoxyethoxy) ethoxy                                 | -            | 0.07         | 0.06         | 0.57         | -            |
| Erythrono-1,4-lactone, (E)-                               | -            | 0.49         | -            | 0.12         | 0.5          |
| 2(4H)-Benzofuranone, 5,6,7,7a-tetrahydro-4,4,7a-trimethyl | -            | 0.09         | 0.02         | 0.06         | 0.1          |
| L-Lyxonic acid 1,4-lactone                                | -            | 0.06         | 0.06         | -            | 0.05         |
| <b>Total identified</b>                                   | <b>99.45</b> | <b>89.93</b> | <b>90.66</b> | <b>93.65</b> | <b>85.64</b> |

**Table S3.** Composition of the cuticular waxes of cork oak leaves solubilised in acetone with different extraction times as determined by GC-MS, in % of total peak area.

| Wax constituent (% total peak area)                | Extraction time |      |      |       |      |
|----------------------------------------------------|-----------------|------|------|-------|------|
|                                                    | 5 min           | 1 h  | 2 h  | 3 h   | 6 h  |
| <b>n-Alkanes</b>                                   |                 |      |      |       |      |
| 6-Methyl octadecane (C <sub>19</sub> )             | -               | 0.01 | 0.36 | 0.01  | -    |
| Nonadecane (C <sub>19</sub> )                      | -               | -    | -    | 0.04  | -    |
| Eicosane (C <sub>20</sub> )                        | -               | -    | 0.76 | -     | -    |
| Heneicosane (C <sub>21</sub> )                     | -               | -    | -    | -     | -    |
| Docosane (C <sub>22</sub> )                        | -               | -    | 0.25 | -     | -    |
| Heptacosane (C <sub>27</sub> )                     | -               | 0.16 | 0.21 | 0.06  | 0.08 |
| Octacosane (C <sub>28</sub> )                      | -               | -    | -    | 0.13  | -    |
| 1-Nonacosene (C <sub>29</sub> )                    | -               | -    | 0.22 | -     | -    |
| Nonacosane (C <sub>29</sub> )                      | -               | 0.26 | -    | 0.13  | 0.14 |
| Triacontane (C <sub>30</sub> )                     | -               | 0.04 | -    | -     | -    |
| <b>n-Alkanols</b>                                  |                 |      |      |       |      |
| Butane-1,2,3-triol (C <sub>4</sub> OH)             | 1.85            | 0.24 | -    | 0.24  | 0.17 |
| 5-Hexen-1-ol (C <sub>6</sub> OH)                   | -               | -    | 0.11 | -     | -    |
| 2-Undecen-1-ol, (E)- C <sub>11</sub> OH)           | -               | 0.04 | 0.21 | 0.25  | -    |
| Hexadecan-1-ol (C <sub>16</sub> OH)                | -               | 0.11 | 0.16 | 0.1   | 0.09 |
| Octadecan-1-ol (C <sub>18</sub> OH)                | -               | 0.06 | -    | 0.03  | 0.04 |
| Docosan-1-ol (C <sub>22</sub> OH)                  | -               | 0.01 | -    | 0.7   | 0.39 |
| Tricosan-1-ol (C <sub>23</sub> OH)                 | -               | 0.04 | -    | 0.04  | 0.03 |
| Tetracosan-1-ol (C <sub>24</sub> OH)               | 0.28            | 3.22 | 3.21 | 2.74  | 1.28 |
| Hexacosan-1-ol (C <sub>26</sub> OH)                | -               | 0.03 | -    | 0.02  | 0.02 |
| Octacosan-1-ol (C <sub>28</sub> OH))               | -               | 0.02 | -    | 0.05  | -    |
| <b>Fatty acids</b>                                 |                 |      |      |       |      |
| <b>Saturated</b>                                   |                 |      |      |       |      |
| Hexenoic acid (C <sub>6:0</sub> )                  | -               | -    | -    | 0.12  | 0.06 |
| Octanoic acid (C <sub>8:0</sub> )                  | -               | 0.06 | 0.09 | 0.03  | 0.04 |
| Tetradecanoic acid (C <sub>14:0</sub> )            | -               | -    | 0.33 | -     | -    |
| Pentadecanoic acid (C <sub>15:0</sub> )            | -               | 0.34 | 0.28 | -     | -    |
| Hexadecanoic acid (C <sub>16:0</sub> )             | -               | 2.51 | 5.54 | 5.92  | 4.35 |
| Heptadecanoic acid (C <sub>17:0</sub> )            | -               | -    | -    | 0.04  | 0.02 |
| Octadecanoic acid (C <sub>18:0</sub> )             | -               | 0.15 | 0.91 | 0.46  | 0.28 |
| Eicosanoic acid (C <sub>20:0</sub> )               | -               | 0.09 | -    | 0.17  | 0.14 |
| Docosanoic acid (C <sub>22:0</sub> )               | -               | 0.11 | 0.12 | 0.14  | 0.1  |
| Tetracosanoic acid (C <sub>24:0</sub> )            | -               | -    | 0.29 | 0.14  | 0.08 |
| Hexacosanoic acid (C <sub>26:0</sub> )             | -               | 0.27 | 0.22 | 0.17  | 0.09 |
| Octacosanoic acid (C <sub>28:0</sub> )             | -               | 0.51 | 0.87 | 0.26  | 0.14 |
| Triacontanoic acid (C <sub>30:0</sub> )            | -               | 0.14 | 0.37 | 0.06  | 0.05 |
| <b>Unsaturated</b>                                 |                 |      |      |       |      |
| 9-cis-Hexadecenoic acid (C <sub>16:1</sub> )       | -               | 0.07 | -    | 0.2   | 0.12 |
| 9,12-Octadecadienoic acid (C <sub>18:2</sub> )     | -               | 0.03 | 0.66 | 1.23  | 0.48 |
| 9,12,15-Octadecatrienoic acid (C <sub>18:3</sub> ) | -               | 0.07 | 0.61 | 0.07  | 1.26 |
| Docosahexaenoic acid (C <sub>22:6</sub> )          | -               | 0.02 | 0.21 | -     | -    |
| <b>Diacids</b>                                     |                 |      |      |       |      |
| Butanedioic acid (C <sub>4:0</sub> )               | 0.13            | -    | 0.95 | 0.99  | 2.45 |
| Nonanedioic acid (C <sub>9:0</sub> )               | -               | -    | 0.04 | 0.1   | 0.05 |
| 2-Butenedioic acid (C <sub>4:1</sub> )             | -               | -    | -    | -     | 0.07 |
| Dodec-2-enedioic acid (C <sub>12:1</sub> )         | -               | -    | -    | -     | 0.11 |
| <b>Hydroxyacids</b>                                |                 |      |      |       |      |
| 2-Hydroxyoctanoic acid (C <sub>8:0</sub> )         | -               | 0.02 | -    | 0.008 | -    |
| <b>Glycerides</b>                                  |                 |      |      |       |      |
| Glycerol                                           | -               | 1.04 | 1.72 | 1.36  | 0.95 |
| 2-Palmitoylglycerol                                | -               | -    | -    | 0.02  | -    |
| 2,3-Dihydroxypropyl icosanoate                     | -               | 0.02 | -    | 0.05  | 0.02 |
| Monopalmitin                                       | -               | 0.06 | -    | 0.16  | 0.11 |
| Monolinolenin                                      | -               | -    | 0.22 | 0.24  | 0.08 |
| <b>Sterols</b>                                     |                 |      |      |       |      |
| δ-Tocopherol                                       | -               | -    | -    | 0.09  | 0.04 |
| Stigmasterol                                       | -               | 0.72 | 0.53 | 0.05  | 0.05 |
| β-Sistoterol                                       | -               | 0.32 | 0.99 | 1.43  | 1.15 |

|                                                                   |              |              |              |             |              |
|-------------------------------------------------------------------|--------------|--------------|--------------|-------------|--------------|
| Cholest-5-en-3-ol, (3 $\alpha$ )                                  | -            | -            | -            | 0.04        | -            |
| <b>Terpenes</b>                                                   |              |              |              |             |              |
| <b>Diterpenes</b>                                                 |              |              |              |             |              |
| Phytol                                                            | -            | 0.01         | -            | 0.18        | 0.05         |
| <b>Pentacyclic triterpenes</b>                                    |              |              |              |             |              |
| $\alpha$ -Amyrin                                                  | -            | 0.28         | 0.49         | 0.3         | 0.33         |
| $\beta$ -Amyrin                                                   | -            | 0.72         | -            | 1.18        | 1.19         |
| Erythrodilol (a-Amyrin)                                           | -            | 0.03         | -            | 0.05        | -            |
| Germanicol                                                        | -            | 2.89         | 2.05         | 2.71        | 2.86         |
| Lupeol                                                            | 0.01         | 14.53        | 16.25        | 14.71       | 16.15        |
| Betulin                                                           | -            | 0.19         | 0.39         | 0.35        | 0.42         |
| Betulinic acid                                                    | -            | 0.18         | -            | 0.23        | 0.29         |
| Oleanolic acid                                                    | -            | 0.26         | 0.4          | 0.35        | 0.37         |
| Ursolic acid                                                      | -            | 0.25         | 0.29         | 0.29        | 0.33         |
| Corosolic acid                                                    | -            | 0.11         | 0.38         | 0.18        | 0.16         |
| <b>Aromatic compounds</b>                                         |              |              |              |             |              |
| Benzoic acid                                                      | -            | 0.91         | 0.83         | 0.17        | 0.14         |
| 4-methyl-2-(4-phenylphenyl)pentan-2-ol                            | 0.26         | -            | -            | -           | -            |
| Cathechine                                                        | 13.18        | 0.02         | -            | 0.05        | 0.04         |
| Epigallocatechin                                                  | 0.04         | -            | -            | -           | -            |
| 4-Hydroxybenzaldehyde                                             | -            | -            | 0.19         | 0.03        | 0.1          |
| 4-Hydroxybenzoic acid                                             | -            | 0.06         | 0.32         | -           | -            |
| Vanillin acid                                                     | -            | 0.14         | 0.28         | 0.02        | 0.03         |
| 1,2-Benzenedicarboxylic acid, butyl 8-methylnonyl ester           | -            | 0.11         | -            | -           | -            |
| Hexadecy-(E)-p-coumarate                                          | 0.01         | 1.67         | 1.62         | 2.35        | 2.42         |
| <b>Sugars</b>                                                     |              |              |              |             |              |
| D-(+)-Ribono-1,4-lactone (isomer)                                 | -            | 0.07         | -            | -           | -            |
| D-(+)-Ribono-1,4-lactone (isomer)                                 | -            | -            | -            | -           | 0.06         |
| Levoglucozan                                                      | -            | 0.18         | 0.28         | 0.45        | 0.22         |
| Myo Inositol                                                      | 19.97        | -            | 15.06        | -           | -            |
| Scyllo Inositol                                                   | -            | 15.44        | 14.27        | 12.39       | 14.88        |
| Deoxinositol                                                      | -            | 6.28         | 1.81         | 5.24        | 6.3          |
| D-(-)-Fructofuranose (isomer)                                     | 0.24         | 3.02         | 0.94         | 1.61        | 1.83         |
| D-Fructose                                                        | -            | 12.45        | 10.33        | 9.07        | 6.78         |
| D-Ribose                                                          | -            | 0.97         | 0.55         | 0.49        | 0.56         |
| Scyllo-Inositol                                                   | -            | -            | 0.28         | -           | 0.11         |
| ( $\alpha$ / $\beta$ ) D-Glucopyranose (isomer)                   | 0.46         | 8.64         | 6.28         | 5.62        | 7.96         |
| $\beta$ -D-(+)-Mannopyranose                                      | 0.36         | 0.81         | -            | 0.35        | 0.6          |
| ( $\alpha$ / $\beta$ ) D-Glucopyranose (isomer)                   | -            | 8.42         | -            | 5.47        | 6.98         |
| ( $\alpha$ / $\beta$ ) Ethyl $\alpha$ -D-glucopyranoside (isomer) | -            | -            | -            | 0.05        | 0.03         |
| ( $\alpha$ / $\beta$ ) Ethyl -D-glucopyranoside (isomer)          | -            | 0.05         | -            | 0.04        | 0.04         |
| Sucrose                                                           | 18.17        | 0.48         | 0.21         | 0.47        | 0.4          |
| <b>Others compounds</b>                                           |              |              |              |             |              |
| 4,8,12,16-Tetramethylheptadecan-4-olide                           | -            | 0.04         | -            | 0.05        | -            |
| (15R)-15-methyl prostaglandin E2 methyl ester                     | -            | 0.04         | -            | -           | -            |
| Lactic acid                                                       | 0.04         | -            | -            | -           | -            |
| Ethylene glycol                                                   | -            | 0.28         | 0.22         | 0.32        | -            |
| Glyceric acid                                                     | -            | -            | 0.13         | 0.15        | 0.13         |
| 3-Hydroxisocaproic acid                                           | -            | -            | -            | 0.21        | -            |
| Malic acid                                                        | -            | 0.36         | 0.11         | 1.02        | 0.65         |
| 2-Pentadecanone, 6,10,14-trimethyl                                | -            | -            | -            | -           | -            |
| 3-Hydroxypropyl palmitate                                         | -            | 0.01         | -            | 0.02        | 0.02         |
| Glycyl-L-Valine                                                   | -            | 0.18         | -            | 0.13        | -            |
| 2(3H)-Furanone, dihydro-3,4-bis[(trimethylsilyloxy]-, trans-      | -            | 0.36         | 0.19         | 0.64        | 0.25         |
| Docosyl octyl ether                                               | -            | 0.04         | -            | 0.04        | -            |
| Quininic acid                                                     | 39.18        | 4.6          | 0.94         | 7.2         | 7.15         |
| Shikimic acid, 4TMS derivative                                    | 5.03         | -            | -            | -           | -            |
| 2,3,4-Trihydroxybutyric acid                                      | -            | 0.24         | 0.09         | 0.15        | 0.22         |
| <b>Total identified</b>                                           | <b>99.84</b> | <b>93.35</b> | <b>92.03</b> | <b>89.7</b> | <b>91.57</b> |
