# Supplementary material
Source: MDPI journal article supplement (https://www.mdpi.com/2227-9717/10/11/2270)
Supplement: s1 [file s1 › Fig Suppl. GC-MS chromatograms (5 min and 3 h).pdf]

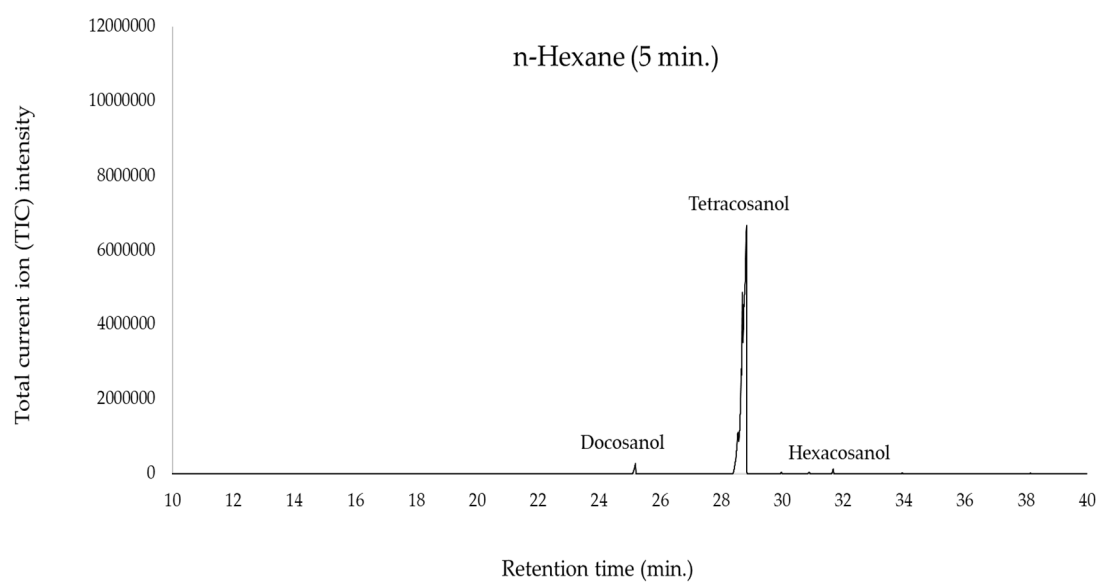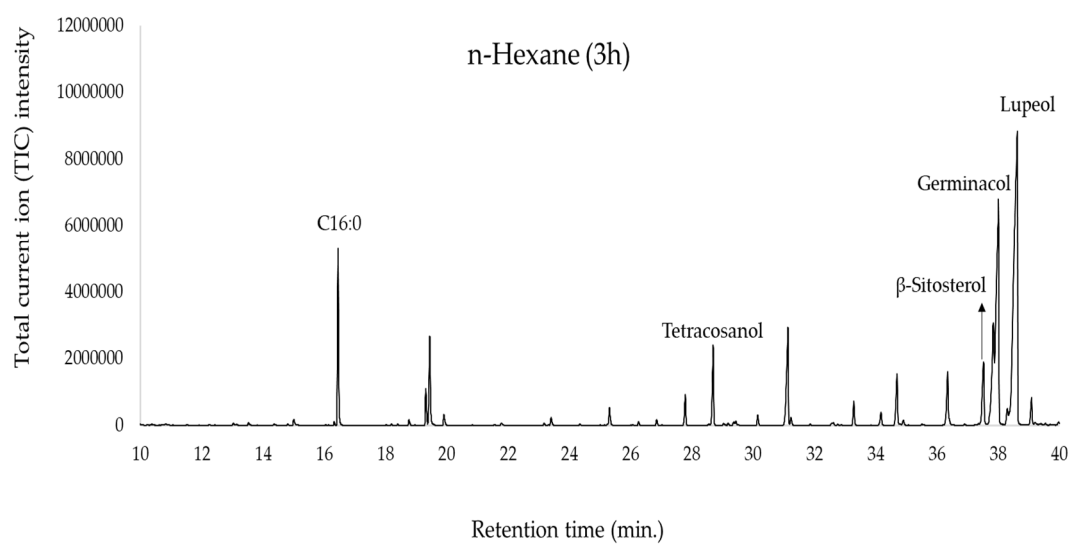

**Figure S1.** GC–MS chromatogram of the derivatised n-hexane extracts at 5 min and 3 h, from the cuticular waxes of cork oak leaves.

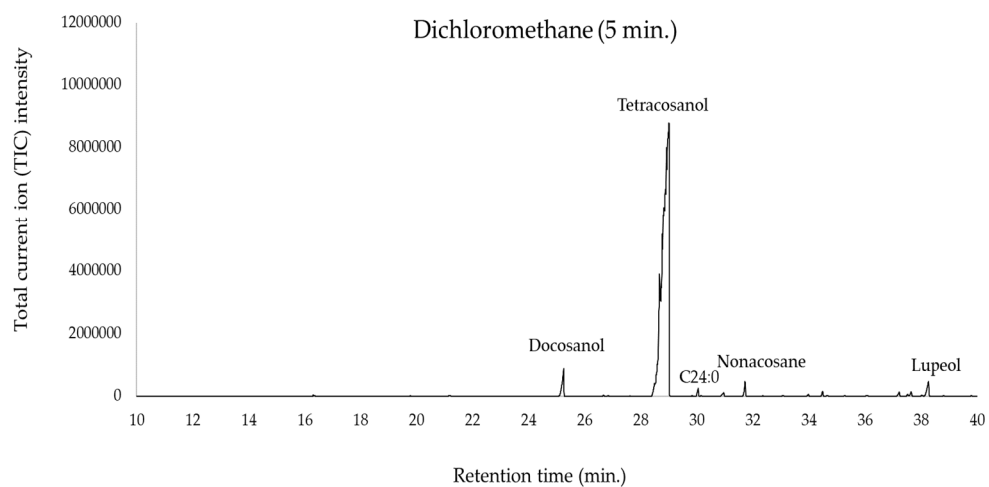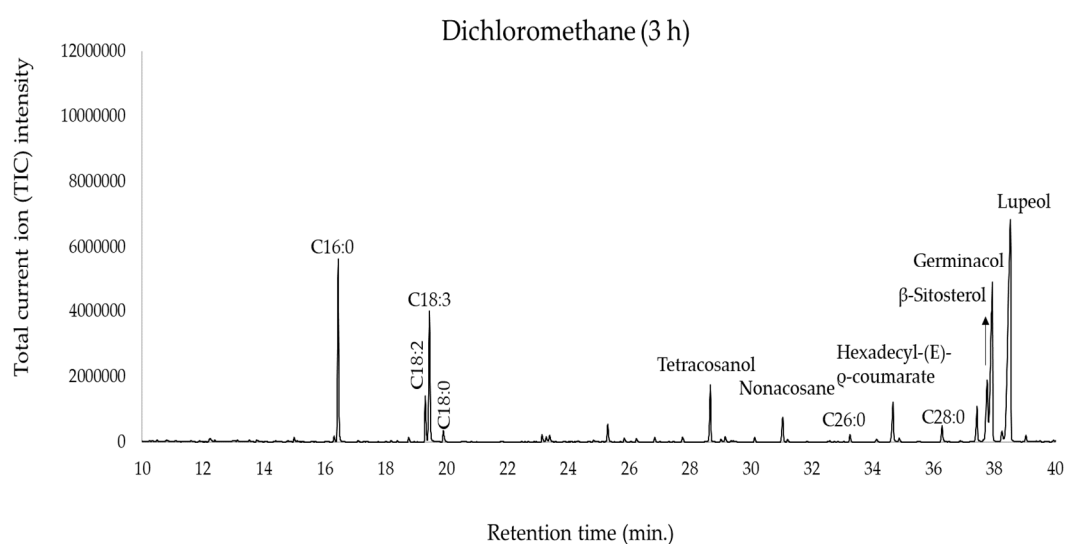

**Figure S2.** GC-MS chromatogram of the derivatised dichloromethane extracts at 5 min and 3 h, from the cuticular waxes of cork oak leaves.

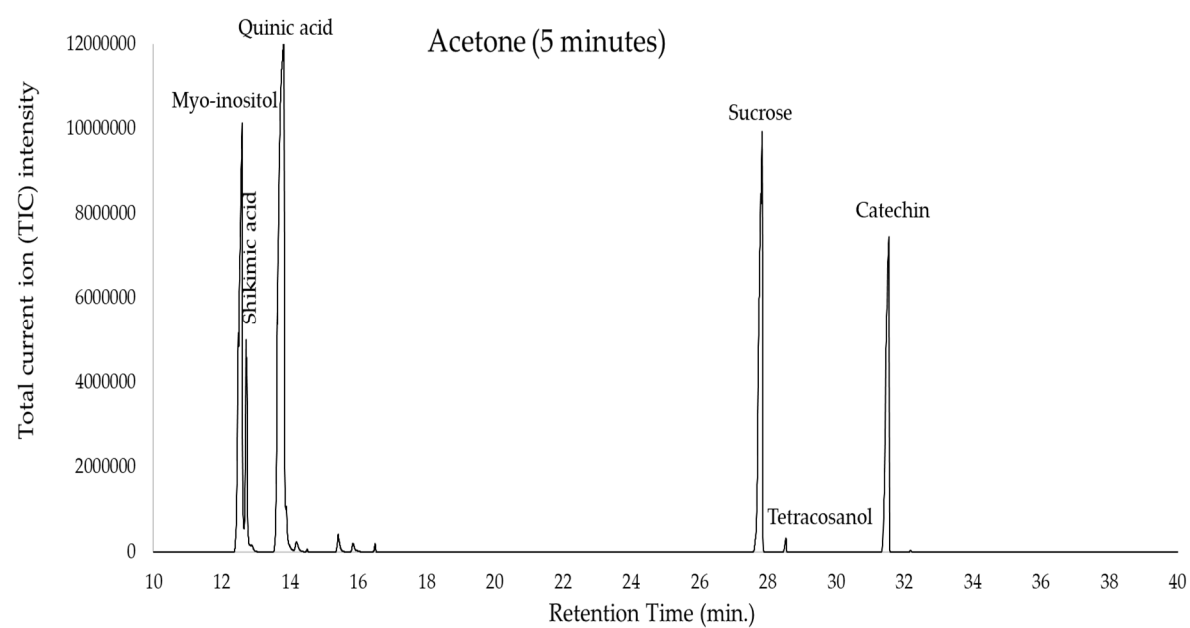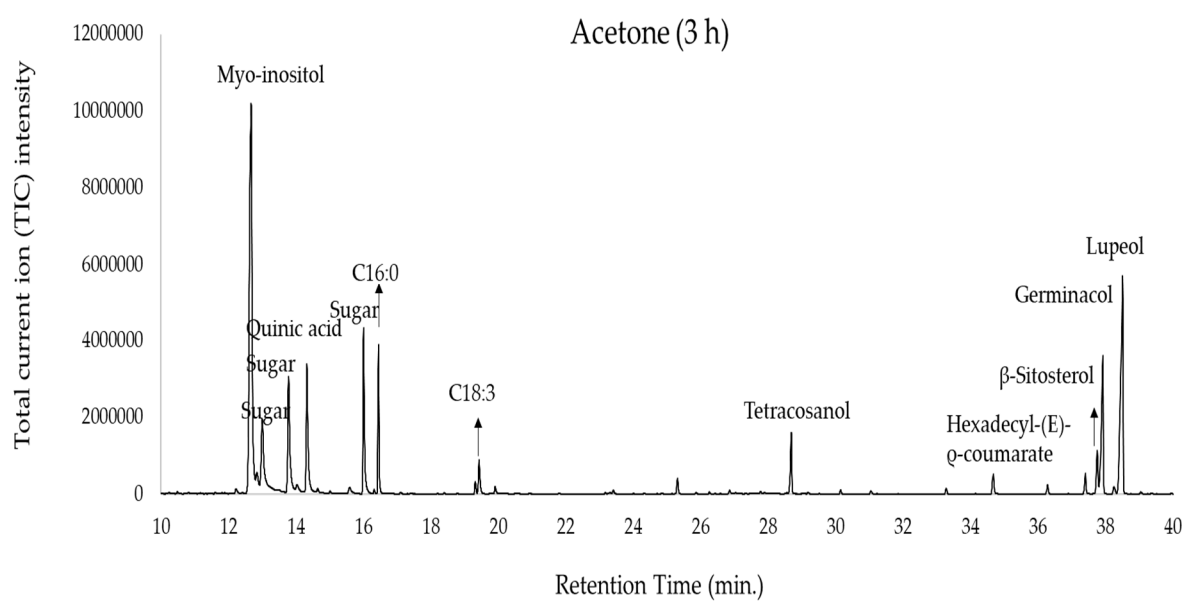

**Figure S3.** GC–MS chromatogram of the derivatised acetone extracts at 5 min and 3 h, from the cuticular waxes of cork oak leaves.
